# Supplementary material for: The Impact of Patient Online Access to Computerized Medical Records and Services on Type 2 Diabetes: Systematic Review
Source: PubMed Central journal article supplement (PMC6054706; doi:10.2196/jmir.7858), 2018-07-06
Supplement: jmir_v20i7e235_app1.pdf [file jmir_v20i7e235_app1.pdf]

## Multimedia Appendix 1: Example Medline Search String

| Diabetes Online Access String    |                                                                                                                                                                                                                                                                |
|----------------------------------|----------------------------------------------------------------------------------------------------------------------------------------------------------------------------------------------------------------------------------------------------------------|
| Database: Medline                |                                                                                                                                                                                                                                                                |
| Platform: EBSCO                  |                                                                                                                                                                                                                                                                |
| Limits: 2012 to 2016, Human only |                                                                                                                                                                                                                                                                |
| 1                                | (MH "Medical Informatics")                                                                                                                                                                                                                                     |
| 2                                | "emr*".ti.ab OR "cmr*".ti.ab                                                                                                                                                                                                                                   |
| 3                                | "electronic medical record*".ti.ab OR "electronic health record*".ti.ab                                                                                                                                                                                        |
| 4                                | "medical record*".ti.ab                                                                                                                                                                                                                                        |
| 5                                | (MH "Electronic Health Records")                                                                                                                                                                                                                               |
| 6                                | "computeri*ed medical record*".ti.ab OR "computeri*ed health record*".ti.ab                                                                                                                                                                                    |
| 7                                | (MH "Medical Records Systems, Computerized")                                                                                                                                                                                                                   |
| 8                                | (MH "Medical Records")                                                                                                                                                                                                                                         |
| 9                                | (MH "Health Records, Personal")                                                                                                                                                                                                                                |
| 10                               | (MH "Records as Topic")                                                                                                                                                                                                                                        |
| 11                               | (MH "Access to Information")                                                                                                                                                                                                                                   |
| 12                               | (MH "Patient Access to Records")                                                                                                                                                                                                                               |
| 13                               | OR/1-12                                                                                                                                                                                                                                                        |
| 14                               | (web* OR internet OR www OR electronic* OR online OR "electronic mail*" OR email* OR e-mail* OR "web mail*" OR webmail* OR "internet mail*" OR messag*).ti.ab                                                                                                  |
| 15                               | (patient OR health OR information OR web OR internet) N5 portal*.ti.ab                                                                                                                                                                                         |
| 16                               | ("ehealth" OR "e-health") NOT ((MH "health promotion") OR "health promotion" OR "promotion of health").ti.ab                                                                                                                                                   |
| 17                               | (e-prescri* OR electronic prescribe* OR e-health) AND (web* OR internet). ab.ti                                                                                                                                                                                |
| 18                               | (online OR web* OR internet) N4 (consult* OR service* OR intervention* OR therap* OR treatment* OR counsel*).ti.ab                                                                                                                                             |
| 19                               | (web* OR internet OR www OR electronic* OR online) N5 (messag* OR communicat* OR transmit* OR transfer* OR send* OR deliver* OR feedback OR letter* OR interactive* OR input* OR forum OR appointment* OR booking* OR referral* OR consult* OR prescri*).ti.ab |
| 20                               | (MH "Triage") AND (web form* OR web chat* OR web based triage or web)                                                                                                                                                                                          |
| 21                               | OR/15-20                                                                                                                                                                                                                                                       |
| 22                               | (MH "Diabetes Mellitus, Type 2+")                                                                                                                                                                                                                              |
| 23                               | Diabet*.ti.ab                                                                                                                                                                                                                                                  |
| 24                               | (NIDDM or MODY or T2DM or T2D).ti.ab                                                                                                                                                                                                                           |
| 25                               | (non\$insulin\$depend*).ti.ab                                                                                                                                                                                                                                  |
| 26                               | OR/22-25                                                                                                                                                                                                                                                       |
| 27                               | (MH "General Practice")                                                                                                                                                                                                                                        |
| 28                               | (MH "General Practitioners")                                                                                                                                                                                                                                   |
| 29                               | (MH "Family Practice")                                                                                                                                                                                                                                         |
| 30                               | (MH "Primary Health Care")                                                                                                                                                                                                                                     |
| 31                               | (MH "ambulatory care") OR (Ambulatory Care Facilitates")                                                                                                                                                                                                       |
| 32                               | "primary care"                                                                                                                                                                                                                                                 |
| 33                               | "community-based provider*".ti.ab                                                                                                                                                                                                                              |
| 34                               | OR/27-33                                                                                                                                                                                                                                                       |
| 35                               | 13 AND 21 AND 26 AND 34                                                                                                                                                                                                                                        |
| <b>Key</b>                       |                                                                                                                                                                                                                                                                |
| Ti- title word                   |                                                                                                                                                                                                                                                                |
| Ab - abstract word               |                                                                                                                                                                                                                                                                |
| MH - Main index/ MeSH term       |                                                                                                                                                                                                                                                                |
