# Supplementary material for: The Impact of Patient Online Access to Computerized Medical Records and Services on Type 2 Diabetes: Systematic Review
Source: PubMed Central journal article supplement (PMC6054706; doi:10.2196/jmir.7858), 2018-07-06
Supplement: jmir_v20i7e235_app2.pdf [file jmir_v20i7e235_app2.pdf]

## Multimedia Appendix 2: Study Design/ Characteristics

| Study Design                                                        | Country, Number    | Author, Year & Reference                                                                                                                                                                      |
|---------------------------------------------------------------------|--------------------|-----------------------------------------------------------------------------------------------------------------------------------------------------------------------------------------------|
| <b>Audit (Retrospective)</b>                                        | USA, 3             | Bredfeldt et al (2011) [42]<br>Weppner et al (2010) [41]<br>Tenforde et al (2011) [43]                                                                                                        |
| <b>Cohort studies (retrospective, prospective and longitudinal)</b> | USA, 3             | Jones et al (2015) [50]<br>Roblin et al (2009) [38]<br>Harris et al (2013) [48]                                                                                                               |
| <b>Quasi-experimental (single interrupted time series-design)</b>   | USA, 1             | Grembowski et al (2012) [44]                                                                                                                                                                  |
| <b>Interpretative Review</b>                                        | UK, 1              | Jilka et al (2015) [58]                                                                                                                                                                       |
| <b>Focus groups/ Interviews</b>                                     | USA, 3             | *Wade-Vuturo et al (2013) [46]<br>Hess et al (2007) [36]<br>Ralston et al (2004) [32]                                                                                                         |
|                                                                     | Australia, 1       | Bomba et al (2004) [59]                                                                                                                                                                       |
|                                                                     | UK, 1              | Fisher et al (2009) [57]                                                                                                                                                                      |
| <b>Randomised / Control &amp; Cluster Trials (RCT)</b>              | USA, 4             | Shea et al (2006) [34]<br>Ralston et al (2009) [37]<br>Tang et al (2013) [49]<br>Grant et al (2008) [52]                                                                                      |
|                                                                     | France, 1          | Holbrook et al (2009) [53]                                                                                                                                                                    |
| <b>Survey (including cross-sectional/ analysis)</b>                 | USA, 7             | Wald et al (2010) [40]<br>Sarkar et al (2010) [39]<br>Sarkar et al (2011) [51]<br>Berryman et al (2013) [47]<br>Lyles et al (2012) [45]<br>Harris et al (2009) [35]<br>Hess et al (2006) [33] |
|                                                                     | The Netherlands, 3 | Ronda et al (2013) [56]<br>Ronda et al (2014) [55]<br>Ronda et al (2015) [54]                                                                                                                 |

\* Mixed methods (interviews & survey)
