# Supplementary material for: The Impact of Patient Online Access to Computerized Medical Records and Services on Type 2 Diabetes: Systematic Review
Source: PubMed Central journal article supplement (PMC6054706; doi:10.2196/jmir.7858), 2018-07-06
Supplement: jmir_v20i7e235_app3.pdf [file jmir_v20i7e235_app3.pdf]

**Multimedia Appendix 3: Evidence Tables - Online CMR & Services for patients with T2DM**

**Key terms:** CMR (Computerized Medical Records), GP (General Practitioner), PHC (Primary Health Care), Usual Care (UC), Confidence Interval (CI), Focus Groups (FGs), RCT (Randomized Controlled Trial) T2DM (Type 2 Diabetes Miletus), LDL (low-density lipoprotein), HbA<sub>1c</sub> (glycated hemoglobin),

| <b>Reference, Country, MMAT Score</b> | <b>Study Design</b>                               | <b>Participation / Population (T2DM), Participants &amp; Settings</b> | <b>Study/ Intervention Aim</b>                                                               | <b>Instruments Used/ Tools<br/>Primary, Secondary and Comparator Groups</b>                                                         |
|---------------------------------------|---------------------------------------------------|-----------------------------------------------------------------------|----------------------------------------------------------------------------------------------|-------------------------------------------------------------------------------------------------------------------------------------|
| Ralston et al 2004 [32], USA, 50      | Qualitative study using semistructured interviews | T2DM aged 43-65 years n=9/35 adults, PHC                              | To explore the experiences of diabetes management with CMRs use                              | Access to CMR emails, blood glucose readings, education site, an interactive online diary for exercise, diet and medication regimes |
| Hess et al 2006 [33], USA, 25         | Survey<br>5 FGs follow up interviews              | DM mean age 53.4 years, n=21/ no total, 3xPHC                         | To evaluate a CMR portal with customized portal features                                     | Patient portal for preventative health reminders, appointments, medication lists and educational materials                          |
| Shea et al 2006 [34], USA, 100        | RCT                                               | T2DM Aged ≥ 55 years. n=1665/ 9,597 HbA <sub>1c</sub> >7.0%, PHC      | To evaluate impact of home telemedicine unit to usual care, on clinical outcomes             | Home telemedicine unit                                                                                                              |
| Harris et al 2009 [35], USA, 75       | Cross-sectional survey                            | T2DM. Mean ages 58 and 63 years. n=5274/ 15,427, PHC                  | To determine if CMR use is linked to higher quality of care and lower outpatient utilization | A website for SM, prescription refills, appointment scheduling, access to medical records                                           |

|                                           |                                                                                          |                                                                                  |                                                                                                                    |                                                                                                                                                                                                                                                   |
|-------------------------------------------|------------------------------------------------------------------------------------------|----------------------------------------------------------------------------------|--------------------------------------------------------------------------------------------------------------------|---------------------------------------------------------------------------------------------------------------------------------------------------------------------------------------------------------------------------------------------------|
| Hess et al<br>2007 [36],<br>USA,<br>75    | 5 FGs (n=21)<br>pre-<br>implementati<br>on 5 FG<br>(n=18)<br>post-<br>implementati<br>on | DM<br>Mean age 54,<br>n=39/no<br>total, 3x PHC                                   | To assess patient<br>reaction and<br>challenges with<br>eHealth<br>technology                                      | eHealth personal<br>record system<br>comprising of CMR<br>information, health<br>reminders and SM to<br>provide shared<br>information with the<br>provider, offering<br>preventive health care<br>reminders, and<br>general health<br>information |
| Ralston et al<br>2009 [37],<br>USA,<br>75 | Pilot RCT                                                                                | T2DM<br>Mean age 59.4<br>vs 57.9<br>n=83/ 709<br>HbA <sub>1c</sub> <7.0%,<br>PHC | To test Web-<br>based care<br>management of<br>glycemic control<br>using CMR                                       | Access to interactive<br>online CMR diary for<br>recording, BG,<br>medications, exercise<br>diet and SM.<br>Systolic & diastolic BP,<br>total cholesterol levels<br>(TCL)                                                                         |
| Roblin et al<br>2009 [38],<br>USA,<br>50  | Longitudinal<br>cohort survey<br>clustered<br>randomized<br>design.                      | T2DM<br>Adults > 25<br>years<br>n=1,777/<br>5,309, PHC                           | To assess racial<br>preference for<br>registering with<br>a Kaiser<br>Permanente<br>CMR system                     | Online access to CMR<br>for appointments,<br>refill prescription, lab<br>results, complete a<br>health appraisal and<br>health information                                                                                                        |
| Sarkar et al<br>2010 [39],<br>USA,<br>75  | Survey                                                                                   | T2DM<br>Mean age 52<br>years<br>n=14,102/40,<br>735,<br>PHC                      | Compare use of<br>portal for<br>English-speaking<br>patients versus<br>patients with<br>limited health<br>literacy | Web-portal access for<br>health promotion, lab<br>results, email from<br>physicians,<br>medications refills,<br>medical<br>appointments,<br>Health insurance<br>information                                                                       |
| Wald et al<br>2010, [40],<br>USA,<br>75   | RCT- survey                                                                              | T2DM<br>Mean ages 43<br>years<br>n= 3,979/<br>21,533,<br>PHC                     | To describe<br>patients<br>experiences of<br>pre-visit e-<br>Journal use                                           | eJournal linked to<br>CMR via portal.<br>Purpose was to review<br>clinical information in<br>preparation for a face-<br>to-face visit with<br>provider                                                                                            |
| Weppner et                                | Retrospective                                                                            | T2DM                                                                             | To evaluate the                                                                                                    | Shared medical record                                                                                                                                                                                                                             |

|                                                 |                                                 |                                                                                                                                 |                                                                                                                                             |                                                                                                                                                                                                                                                                                                                                |
|-------------------------------------------------|-------------------------------------------------|---------------------------------------------------------------------------------------------------------------------------------|---------------------------------------------------------------------------------------------------------------------------------------------|--------------------------------------------------------------------------------------------------------------------------------------------------------------------------------------------------------------------------------------------------------------------------------------------------------------------------------|
| al 2010 [41],<br>USA,<br>75                     | cohort study                                    | patients aged<br>>65 years<br>n=6185/7,076,<br>PHC                                                                              | use of SMR<br>between older<br>patients and<br>providers                                                                                    | with a SM service,<br>medication refills<br>requests, personal<br>appointments,<br>viewing test results,<br>after-visit summaries,<br>medical problem lists,<br>allergies, and<br>immunizations                                                                                                                                |
| Bredfeldt et<br>al 2011 [42],<br>USA,<br>75     | Retrospective<br>study                          | DM >18 years<br>n=174<br>primary care<br>physicians/<br>Total<br>population<br>not reported,<br>HbA <sub>1c</sub> >7.5%,<br>PHC | To determine the<br>relationship<br>between<br>effectiveness SM<br>or phone calls<br>and Diabetes<br>Recognition<br>Program scores<br>(DRP) | Use of descriptive<br>statistics and linear<br>regression models to<br>examine the use of<br>SM/phone and DRP<br>scores. Use of a<br>Generalized<br>Estimating Equation<br>model                                                                                                                                               |
| Tenforde et<br>al 2011 [43],<br>USA,<br>100     | Retrospective<br>audit                          | T2DM<br>Mean age 47<br>years<br>n=4036<br>record<br>users/10,746,<br>PHC                                                        | To measure the<br>association of<br>CMR use per<br>days and<br>diabetes quality<br>measures                                                 | Diabetes quality<br>control measures<br>including; HbA <sub>1c</sub> , LDL,<br>BP, BMI, hypertensive<br>medications<br>(angiotensin-<br>converting enzyme<br>inhibitors (ACEi)/<br>angiotensin-receptor<br>blockers (ARB),<br>microalbumin testing,<br>pneumococcal<br>vaccinations, food &<br>eye exam, and<br>smoking status |
| Grembowski<br>et al 2012<br>[44],<br>USA,<br>75 | Single<br>interrupted<br>time series-<br>design | T2DM mean<br>n=4971/9871<br>age 63<br>HbA <sub>1c</sub> <7.0%,<br>PHC                                                           | To examine<br>whether a Group<br>Health Co-<br>operative (GHC)<br>changed<br>utilization and<br>cost of care                                | The evaluation of a<br>new service called<br>Access Initiative (AI)<br>comprising of secure<br>email to physicians<br>and access to<br>electronic medical<br>records                                                                                                                                                           |
| Lyles et al<br>2012 [45],                       | Cross-<br>sectional                             | DM >65years<br>n=718/910,                                                                                                       | To assess the<br>relationship                                                                                                               | CMR allowed viewing<br>after-visits, doctor                                                                                                                                                                                                                                                                                    |

|                                   |                                                               |                                                                                                                                                               |                                                                                                                                                  |                                                                                                                                                                                     |
|-----------------------------------|---------------------------------------------------------------|---------------------------------------------------------------------------------------------------------------------------------------------------------------|--------------------------------------------------------------------------------------------------------------------------------------------------|-------------------------------------------------------------------------------------------------------------------------------------------------------------------------------------|
| USA, 75                           | survey                                                        | PHC                                                                                                                                                           | between race/ethnicity and CMR use                                                                                                               | summaries, medical history and diagnoses, appointments, prescriptions refills and lab results                                                                                       |
| Wade-Vuturo 2013 [46] USA, 75     | Mixed methods: focus groups and survey                        | T2DM<br>Mean age 57 years.<br>Analysis from n=39 FG (users) and n=54 (total) survey respondents/<br>total study population not reported, PHC                  | To explore how adults with T2DM use a patient portal, to understand non-users perspectives; and the relationship between SM and glycemic control | A patient portal enabling access to CMR and SM to communicate with providers, manage medical appointments and bills                                                                 |
| Berryman et al 2013 [47], USA, 75 | Cross-sectional, practice level study.                        | T2DM > 18 years, Mean age 40 years.<br>TP1 n=1020<br>TP2 n=1021<br>TP3 n=1000<br>TP4 n=1025/<br>total population not reported<br>HbA <sub>1c</sub> <7.0%, PHC | To evaluate differences in DM quality metrics at four time points (TPs), before and after the introduction of CMR reminders                      | Automatic CMR reminder letters sent when records showed non-compliance for quality metrics; HbA <sub>1c</sub> , LDL, and BP                                                         |
| Harris et al 2013 [48], USA, 50   | Retrospective longitudinal cohort.<br>Observational analysis. | T2DM>18 years<br>n=6301/<br>15,438<br>HbA <sub>1c</sub> <7.0%, <8.0%, <9.0%, PHC                                                                              | To determine differences in glycemic control and adherence to HbA <sub>1c</sub> testing associated with SM                                       | A website for prescription refills, appointment scheduling, computerized medical records and SM access.<br>HbA <sub>1c</sub> < 7%, HbA <sub>1c</sub> <8% and HbA <sub>1c</sub> >9%. |
| Tang et al 2013 [49], USA, 100    | Two-armed RCT. Online questionnaire                           | T2DM aged>18 years<br>n=415/6907                                                                                                                              | To evaluate an online disease management system,                                                                                                 | Wireless home access to a glucometer, diabetes summary status, nutrition &                                                                                                          |

|                                          |                                                                                    |                                                                                                                                       |                                                                                                                                               |                                                                                                                                                                                                                                                     |
|------------------------------------------|------------------------------------------------------------------------------------|---------------------------------------------------------------------------------------------------------------------------------------|-----------------------------------------------------------------------------------------------------------------------------------------------|-----------------------------------------------------------------------------------------------------------------------------------------------------------------------------------------------------------------------------------------------------|
|                                          |                                                                                    | HbA <sub>1c</sub> >7.5%,<br>PHC                                                                                                       | compared with<br>usual care                                                                                                                   | exercise logs, insulin<br>records and online<br>messaging with health<br>team. Other services<br>include access to<br>medication<br>management advice,<br>personalized texts/<br>video educational<br>sessions. LDL, BP                             |
| Jones et al<br>2015 [50],<br>USA,<br>75  | Longitudinal<br>cohort                                                             | T2DM<br>comparison of<br>n=3297 users<br>and n=1648<br>non-users/<br>n= 4945<br>(total),<br>PHC                                       | To describe the<br>types and<br>patterns of<br>portal users in<br>an integrated<br>delivery system                                            | A web-based portal to<br>enable access to<br>medications, problem<br>lists, preventative<br>health reminders,<br>office visits,<br>medication refills,<br>appointments &<br>requesting referrals,<br>HbA <sub>1c</sub> , LDL, BP and<br>BMI results |
| Sarkar et al<br>2011 [51],<br>USA,<br>75 | Survey-<br>validated and<br>use in a<br>previous<br>study.<br>Response rate<br>62% | T2DM<br>Mean age 52<br>years.<br>n=5671<br>(40%)<br>requested<br>portal<br>passwords/<br>n=14,102,<br>HbA <sub>1c</sub> <7.0%,<br>PHC | To examine<br>whether social<br>factors influence<br>the use of a<br>patient portal                                                           | Portal access for lab<br>results, email from<br>physicians,<br>medications refills,<br>medical appointments                                                                                                                                         |
| Grant et al<br>2008 [52],<br>USA,<br>75  | RCT                                                                                | T2DM<br>Mean age 46<br>years<br>n=244/<br>6797, PHC                                                                                   | To evaluate the<br>impact of online<br>access to CMR to<br>tailor DM<br>decision support<br>and for patient<br>to 'develop a<br>plan of care' | DM-specific computer<br>medical record linked<br>directly to primary<br>care physician.<br>Blood pressure and<br>LDL-C control                                                                                                                      |
| Holbrook et<br>al 2009 [53],<br>France,  | RCT                                                                                | T2DM<br>Mean age 60.7<br>n=511/1610,                                                                                                  | To assess the<br>effectiveness of a<br>shared decision                                                                                        | Shared access to web-<br>based diabetes tracker<br>clinical composite                                                                                                                                                                               |

|                                        |                                                              |                                                       |                                                                                                                |                                                                                                                                               |
|----------------------------------------|--------------------------------------------------------------|-------------------------------------------------------|----------------------------------------------------------------------------------------------------------------|-----------------------------------------------------------------------------------------------------------------------------------------------|
| 75                                     |                                                              | PHC                                                   | support system to improve diabetes care processes & clinical markers                                           | scores, QOL scores, continuity of care & usability                                                                                            |
| Ronda et al 2015 [54], Netherlands, 75 | Survey. Response rates 42.8% (n=632/1476)                    | DM Mean age 59.7 yrs. n=1500, PHC                     | To examine patient experiences and use of a Web-portal to access CMR to determine the need for portal redesign | The Web-portal aimed to enhance shared medical record access including access to test results, problem lists, and treatment goals             |
| Ronda et al 2014 [55], Netherlands, 50 | Cross sectional design/ survey. Response rate 66.63%, n=2391 | DM Mean age 63.9. n= 2931/4500, x62 PHC               | To identify perceived barriers of a web-based portal to optimize use                                           | Web portal comprising of access to medical records, medical consultation information, test results, problem lists and treatment goals         |
| Ronda et al 2013 [56], Netherlands, 75 | Survey. Response rates 66.63%, n=2931                        | T2DM Mean age 63.9 yrs. n= 1500/4500, x62 PHC         | To examine differences and satisfaction rates of T1DM and T2DM users or non-users of a web portal              | Web portal to access CMR through the internet                                                                                                 |
| Fisher et al, 2009 [57], UK, 75        | FGs and telephone interviews.                                | DM > 20 years n=43 Total population not reported, PHC | To explore patients use of CMR, its benefits, impact, and risks                                                | A service offering electronic access to full medical records (including details on consultation prescriptions, test results, and vaccinations |
| Jilka et al 2015 [58], UK MMAT: N/A    | Interpretative review (n=10)                                 | Patients with diabetes and hypertension. PHC          | To evaluate the impact of a Patient accessible electronic health records for patients to                       | A systematic review focusing on the impact of electronic health record access from patients and HCPs perspectives                             |

|                                      |                                                                           |                                                                         |                                                                                                                                                              |                                                                          |
|--------------------------------------|---------------------------------------------------------------------------|-------------------------------------------------------------------------|--------------------------------------------------------------------------------------------------------------------------------------------------------------|--------------------------------------------------------------------------|
|                                      |                                                                           |                                                                         | manage personal clinical information                                                                                                                         |                                                                          |
| Bomba et al 2004 [59], Australia, 75 | Feasibility study - field trial. FG interviews to develop a questionnaire | T2DM<br>n=6 GPs<br>n=20 patients.<br>Total population not reported, PHC | To test the feasibility of building a CMR for access using a USB (universal serial bus) stick (with unique identifier technology).<br>To evaluate USB access | UBS technology system to automatically collect data linked to remote CMR |
