# Supplementary material for: The Impact of Patient Online Access to Computerized Medical Records and Services on Type 2 Diabetes: Systematic Review
Source: PubMed Central journal article supplement (PMC6054706; doi:10.2196/jmir.7858), 2018-07-06
Supplement: jmir_v20i7e235_app4.pdf [file jmir_v20i7e235_app4.pdf]

**Multimedia Appendix 4: Continued Evidence Tables - Online CMR & Services for patients with T2DM**

**Key terms:** CMR (Computerized Medical Records), GP (General Practitioner), PHC (Primary Health Care), Usual Care (UC), Confidence Interval (CI), Focus Groups (FGs), RCT (Randomized Controlled Trial) T2DM (Type 2 Diabetes Miletus), LDL (low-density lipoprotein), HbA<sub>1c</sub> (glycated hemoglobin),

| <b>Reference, Country, MMAT Score</b> | <b>Statistical Test Used</b>  | <b>Main Findings (outcome measure findings)</b>                                                                                                                                                                                                                                                                                                                                                                                                                                                                                               | <b>Key Recommendations &amp; Implications</b>                                                    |
|---------------------------------------|-------------------------------|-----------------------------------------------------------------------------------------------------------------------------------------------------------------------------------------------------------------------------------------------------------------------------------------------------------------------------------------------------------------------------------------------------------------------------------------------------------------------------------------------------------------------------------------------|--------------------------------------------------------------------------------------------------|
| Ralston et al 2004 [32], USA, 50      | Qualitative thematic analysis | Patients valued; <ul style="list-style-type: none"> <li>• Individual concerns being heard when newly diagnosed and with acute concerns.</li> <li>• Virtual presence of NP to answer health queries in a timely and consistent manner</li> </ul> Online access to medical tests to track health status and being able to communicate with NPs<br>Least valued; <ul style="list-style-type: none"> <li>• When NPs did not communicate results, patients felt disappointed</li> <li>• Technical failures &amp; being ‘cut off’ online</li> </ul> | Research needs to focus on how to design future CMR programs for T2DM patients’ individual needs |
| Hess et al 2006 [33], USA, 25         | Descriptive statistics        | <ul style="list-style-type: none"> <li>• Most frequent users of the portal were male, from ethnic minority groups and newly diagnosed within 5 years.</li> <li>• Virtual engagement encourages review of results, &amp; management of medication lists</li> </ul>                                                                                                                                                                                                                                                                             | Future work needs to address the usefulness of portals for disease-specific patients             |

|                                       |                                         |                                                                                                                                                                                                                                                                                                                                                                                                                                                                                                                                                                                                                                                                            |                                                                                                                                 |
|---------------------------------------|-----------------------------------------|----------------------------------------------------------------------------------------------------------------------------------------------------------------------------------------------------------------------------------------------------------------------------------------------------------------------------------------------------------------------------------------------------------------------------------------------------------------------------------------------------------------------------------------------------------------------------------------------------------------------------------------------------------------------------|---------------------------------------------------------------------------------------------------------------------------------|
|                                       |                                         | <ul style="list-style-type: none"> <li>• Frequent health reminders sent to monitor personal lifestyle goals, to remain well</li> <li>• 62% (13/21) of patients rated SM as a useful way to communicate with health care teams</li> </ul>                                                                                                                                                                                                                                                                                                                                                                                                                                   |                                                                                                                                 |
| Shea et al 2006 [34]<br>USA,<br>100   | Descriptive statistics<br>2 tailed test | Adjusted net reductions favoring the intervention were; <ul style="list-style-type: none"> <li>• HbA<sub>1c</sub>, 0.18% (<math>P=.006</math>), systolic and diastolic blood pressure, 3.4 (<math>P=.001</math>) and 1.9 mm Hg (<math>P&lt;.001</math>), and LDL cholesterol, 9.5 mg/dL (<math>P&lt;.001</math>)</li> </ul>                                                                                                                                                                                                                                                                                                                                                | Barriers to use include lack of data systems resources to upload data. Cost and training and technology are influencing factors |
| Harris et al 2009 [35],<br>USA,<br>75 | Multivariate regression analysis        | <ul style="list-style-type: none"> <li>• SM was associated with better glycemic control and increased outpatient utilization</li> <li>• After multivariable analysis the rate of A1C&lt;7% was 36% higher infrequent users of SM (&gt;12 message threads) compared to non-messaging user groups (relative risk [RR] 1.36; 95% CI 1.16–1.58)</li> <li>• Similarly, rates of primary care visits were 32% higher for SM user groups, compared to non-user groups</li> <li>• This results in higher numbers of outpatient visits between frequent users (RR 1.39, 95% CI 1.26–1.53) and non-SM users (RR 0.98, 95% CI 0.95-1.02, n=15,237, <math>P&lt;.001</math>)</li> </ul> | More research is needed to show links between SM and better medication adherence to improve glycaemic control                   |
| Hess et al 2007 [36],<br>USA,<br>75   | Grounded theory analyses                | <ul style="list-style-type: none"> <li>• e-Technology improved communication and self-efficacy</li> <li>• SM increased, but no change in the number of patient visits or telephone calls</li> <li>• Increased satisfaction linked with viewing records, request</li> </ul>                                                                                                                                                                                                                                                                                                                                                                                                 | Future work should focus on understanding barriers to Diabetes self-management                                                  |

|                                  |                                               |                                                                                                                                                                                                                                                                                                                                                                                                                                                                                                                     |                                                                                                                                                                                                            |
|----------------------------------|-----------------------------------------------|---------------------------------------------------------------------------------------------------------------------------------------------------------------------------------------------------------------------------------------------------------------------------------------------------------------------------------------------------------------------------------------------------------------------------------------------------------------------------------------------------------------------|------------------------------------------------------------------------------------------------------------------------------------------------------------------------------------------------------------|
|                                  |                                               | <p>prescription refills, and control over appointment times</p> <ul style="list-style-type: none"> <li>• Patients frustrated when messages were unanswered, and with technical software issues</li> </ul>                                                                                                                                                                                                                                                                                                           |                                                                                                                                                                                                            |
| Ralston et al 2009 [37], USA, 75 | Linear regression.                            | <ul style="list-style-type: none"> <li>• HbA<sub>1c</sub> declined by 0.7% (95% CI 0.2–1.3) compared with UC at 12 months</li> <li>• BP and TCL levels did not differ between groups</li> <li>• The decrease in GHb was concordant with telephone follow- up from care manager</li> </ul>                                                                                                                                                                                                                           | Web-based care management has the potential to improve glycemic control in patients with T2DM                                                                                                              |
| Roblin et al 2009 [38] USA, 50*  | Descriptive statistics<br>SAS version 9.1 and | <ul style="list-style-type: none"> <li>• Registrants more likely to be Caucasian and African American females (Caucasian 54.8%, n=407, African American 65.3%, n=564 compared to both Caucasian and African American males (Caucasian 45.2%, n=336, African American 34.7%, n=300)</li> <li>• Registration was influenced by levels of education, and less likely for African Americans</li> <li>• Unintended consequences of digital services are widening of disparities due to unequal access and use</li> </ul> | Further research needs to identify the causes of racial and ethnic disparities in accessing digital services. Deficits in education, computer literacy, and IT access may widen disparities in health care |
| Sarkar et al 2010 [39], USA, 75  | Descriptive statistics                        | <ul style="list-style-type: none"> <li>• 62% (n=6099) reported some limitation in health literacy</li> <li>• 40% (n=5671) respondents completed portal registration</li> <li>• In adjusted analyses, those with limited health literacy had higher odds of never signing on to the patient portal (OR 1.7, 95% CI 1.4-1.9) compared with those who did not report any health literacy limitation</li> </ul>                                                                                                         | Those most at risk of poor diabetes health outcomes are also at further risk of falling further behind if health systems increasingly rely on patient portal health services                               |

|                                           |                                         |                                                                                                                                                                                                                                                                                                                                                                                                                                                                                                                                                                                                                                                          |                                                                                                                                                                                                                     |
|-------------------------------------------|-----------------------------------------|----------------------------------------------------------------------------------------------------------------------------------------------------------------------------------------------------------------------------------------------------------------------------------------------------------------------------------------------------------------------------------------------------------------------------------------------------------------------------------------------------------------------------------------------------------------------------------------------------------------------------------------------------------|---------------------------------------------------------------------------------------------------------------------------------------------------------------------------------------------------------------------|
| <p>Wald et al 2010 [40], USA, 75</p>      | <p>Descriptive statistics</p>           | <ul style="list-style-type: none"> <li>Minimal differences in age (48.9 vs 46.7 years, <math>P&lt;.001</math>), gender (60.2% vs 64.7% female, <math>P&lt;.001</math>) and median income (US \$54 617 vs US \$52 012, <math>P&lt;.001</math>) of enrollees and non-users in journal use</li> <li>Larger differences observed by ethnicity (87.1% vs 69.8% Caucasian, <math>P&lt;.001</math>) and insurance (84.7% vs 74.7% privately insured, <math>P&lt;.001</math>)</li> <li>Patients who prepared for visits were more satisfied, because providers' information was more accurate about them, which improved communication with physician</li> </ul> | <p>Further work needed to improve journal integration into physicians practice workflow, and documentation</p>                                                                                                      |
| <p>Weppner et al 2010 [41], USA, 75</p>   | <p>Cox proportional hazard analysis</p> | <ul style="list-style-type: none"> <li>SMR use was associated with younger age, male sex, higher socioeconomic status and overall morbidity levels</li> <li>Initial SMR use was more likely within 3 months of an increase in morbidity (hazard ratio [HR] 1.61, 95% CI 1.28–2.01) and within 1 month of changing to a PCP with higher use (HR 3.02, 1.66–5.51)</li> <li>Web-based SMRs may provide features that are useful to patients with increased morbidity. Endorsement by providers is necessary</li> </ul>                                                                                                                                      | <p>Providing features that are useful to patients with chronic disease and higher morbidity may be important to promote adoption</p> <p>Need to evaluate longer-term effects of SMRs on disease self-management</p> |
| <p>Bredfeldt et al 2011 [42], USA, 75</p> | <p>Descriptive statistics</p>           | <ul style="list-style-type: none"> <li>Physicians who communicate with T2DM via SM significantly improves Diabetes Recognition Program scores.</li> <li>The use of SM and phone by Black or Hispanic groups was associated with improvements</li> </ul>                                                                                                                                                                                                                                                                                                                                                                                                  | <p>Research is needed to understand how different types of SM communication methods impact different populations groups</p>                                                                                         |

|                                     |                                                       |                                                                                                                                                                                                                                                                                                                                                                                                                                                                                                                                                   |                                                                                                                                                                                  |
|-------------------------------------|-------------------------------------------------------|---------------------------------------------------------------------------------------------------------------------------------------------------------------------------------------------------------------------------------------------------------------------------------------------------------------------------------------------------------------------------------------------------------------------------------------------------------------------------------------------------------------------------------------------------|----------------------------------------------------------------------------------------------------------------------------------------------------------------------------------|
|                                     |                                                       | in outcomes scores (HbA <sub>1c</sub> , Cholesterol, BP) $P < 0.01$ )                                                                                                                                                                                                                                                                                                                                                                                                                                                                             |                                                                                                                                                                                  |
| Tenforde et al 2011 [43], USA, 100  | Multivariable logistic regression                     | <ul style="list-style-type: none"> <li>• PHR users were younger, had higher incomes, educational attainment, were more likely to identify as Caucasian, and had better unadjusted and adjusted diabetes quality measure profiles</li> <li>• Adjusted odds ratio of HbA<sub>1c</sub> testing was 2.06 (<math>P &lt; .01</math>) and most recent HbA<sub>1c</sub> was 0.29% lower (<math>P &lt; .01</math>)</li> <li>• PHR users had lower systolic and diastolic BP values than non-users (<math>P &lt; 0.01</math>)</li> </ul>                    | Demographic variables related to age, income health literacy, cultural differences and language barriers need addressing. PHR software programs should be designed with patients |
| Grembowski et al 2012 [44], USA, 75 | Linear regression models                              | <ul style="list-style-type: none"> <li>• Implementation of the Access Initiative (AI) service increased utilization costs and the annual rate of change</li> <li>• Emergency visits increased by 9% annually</li> <li>• Emergency costs rose by 13%, attributed to comorbidity of T2DM</li> </ul>                                                                                                                                                                                                                                                 | Balancing trade-offs between service costs and quality may have unintended consequences, such as reduced efficiency                                                              |
| Lyles et al 2012 [45], USA, 75      | Chi-squared X <sup>2</sup> and 2 sided <i>t</i> tests | <ul style="list-style-type: none"> <li>• There was no association between provider encouragement and shared medical record use by ethnicity</li> <li>• However, in fully adjusted models, black participants [odds ratio (OR) 0.18, 95% CI 0.11-0.30] and Asian participants (OR 0.40, 95% CI 0.20-0.77) were significantly less likely than Caucasian participants to use the CMR</li> <li>• Analysis of those with limited internet use found access to SMR remained the same for black minority groups (OR, 0.25, 95% CI 0.10-0.63)</li> </ul> | Future work should study racial or ethnic differences in patients' access and use of CMR                                                                                         |

|                                   |                                                                  |                                                                                                                                                                                                                                                                                                                                                                                                                                                                                                                                               |                                                                                                                                                                                                             |
|-----------------------------------|------------------------------------------------------------------|-----------------------------------------------------------------------------------------------------------------------------------------------------------------------------------------------------------------------------------------------------------------------------------------------------------------------------------------------------------------------------------------------------------------------------------------------------------------------------------------------------------------------------------------------|-------------------------------------------------------------------------------------------------------------------------------------------------------------------------------------------------------------|
| Wade-Vuturo 2013 [46], USA, 75    | Fisher exact & Mann-Whitney U Spearman's correlation coefficient | <ul style="list-style-type: none"> <li>• Self-reported satisfaction, efficiency and better preparation for face-to-face visits, and access outside office hours</li> <li>• Use of SM to manage a medical appointment was significantly associated with patients glycemic control (<math>P=-.29</math>, <math>P=.04</math>)</li> <li>• Providing up-to-date medication and problem lists in the electronic health record (EHR), avoiding unnecessary office visits</li> <li>• Opportunity to communicate directly with the provider</li> </ul> | In future, it is critical that providers have protected time to devote to patients' messages.                                                                                                               |
| Berryman et al 2013 [47], USA, 75 | Descriptive statistics                                           | <ul style="list-style-type: none"> <li>• Automatic CMR reminder letters showed modest improvement in some DM measures.</li> <li>• HbA<sub>1c</sub> checks improved over a 12-month period.</li> <li>• A gradual decline in HbA<sub>1c</sub> &lt;7.0% at each time point.</li> </ul>                                                                                                                                                                                                                                                           | The implications of this study are that automatic CMR for DM patients not meeting HbA <sub>1c</sub> , LDL or PB goals improves overall process outcome measures related to LDL and HbA <sub>1c</sub> checks |
| Harris et al 2013 [48], USA, 50   | Log-Linear regression models                                     | <ul style="list-style-type: none"> <li>• Greater use of insulin and better glycemic control were associated with greater SM use</li> <li>• Adjusted rate of good glycemic control was higher in relation to higher level of SM in the first year (HbA<sub>1c</sub>&lt; 7% and &lt; 8% <math>P&lt;.05</math>)</li> </ul>                                                                                                                                                                                                                       | SM may modify testing frequency by increasing provider accessibility. Several variables affect pathways for SM, therefore exploring patients' views may enhance patient engagement.                         |
| Tang et al 2013 [49], USA, 100    | Chi-squared X <sup>2</sup> and <i>t</i> -tests                   | <ul style="list-style-type: none"> <li>• Intensification of diabetes treatment (such as an additional treatment or increased dosage of an existing medication) increased in the intervention group (563 vs</li> </ul>                                                                                                                                                                                                                                                                                                                         | A nurse-led multidisciplinary team can manage a population of diabetic patients in an online                                                                                                                |

|                                      |                                            |                                                                                                                                                                                                                                                                                                                                                                     |                                                                                                                                                                        |
|--------------------------------------|--------------------------------------------|---------------------------------------------------------------------------------------------------------------------------------------------------------------------------------------------------------------------------------------------------------------------------------------------------------------------------------------------------------------------|------------------------------------------------------------------------------------------------------------------------------------------------------------------------|
|                                      |                                            | <p>401, <math>P=0.001</math>) compared with the usual care group.</p> <ul style="list-style-type: none"> <li>• There were no significant difference in the total number of diabetes-related physician visits between the intervention and usual care groups (2.4 (2.0) vs 2.3 (1.9); <math>P=0.46</math>)</li> </ul>                                                | disease management program                                                                                                                                             |
| Jones et al 2015 [50], USA, 75       | Factor & cluster analysis                  | <ul style="list-style-type: none"> <li>• Typologies of portal user types of eHealth users such as eDabblers, infrequent intense users, electronic messengers, appointment preparers, lab trackers, biometric monitors, proxy moms, and record updaters</li> <li>• Frequency and intensity of portal use could discriminate various types of health users</li> </ul> | Predictive capabilities may engage different population groups with incentives & messages that can motivate eHealth use and develop new types of software technologies |
| Sarkar et al 2011 [51], USA, 75      | Multivariate logistic regression           | <ul style="list-style-type: none"> <li>• African American participants and Latino participants had higher odds of never logging on (OR 2.6, 95% CI 2.3-2.9); OR 2.3 (95% CI 1.9-2.6), as did those without an educational degree (OR compared to college graduates, 2.3 (95% CI 1.9-2.7), compared with non-Hispanic Caucasian participants.</li> </ul>             | The internet has potential to use visuals, spoken, or multilingual techniques to meet the needs of disadvantaged groups                                                |
| Grant et al 2008 [52], USA, 75       | SAS version 9.0 and Chi-squared $X^2$ test | <ul style="list-style-type: none"> <li>• More patients in the intervention arm had their DM treatment regimens adjusted, and have medication reviews (53%, <math>n=82</math>) vs 15%, <math>n=41</math>; <math>P&lt;0.001</math>) compared with active controls</li> </ul>                                                                                          | Web-based patient portals require significant redesign to engage physicians and patients in non-visit-based care                                                       |
| Holbrook et al 2009 [53], France, 75 | Chi-squared $X^2$ and 2 sided $t$ tests    | <ul style="list-style-type: none"> <li>• <math>HbA_{1c}</math> declined only 0.2% more in the intervention group (<math>n=253</math>), compared to the control group (<math>n=258</math>, <math>P=0.03</math>)</li> </ul>                                                                                                                                           | More research into eHealth technology and through supportive funding                                                                                                   |

|                                        |                                                                                              |                                                                                                                                                                                                                                                                                                                                                               |                                                                                                                                                                                                            |
|----------------------------------------|----------------------------------------------------------------------------------------------|---------------------------------------------------------------------------------------------------------------------------------------------------------------------------------------------------------------------------------------------------------------------------------------------------------------------------------------------------------------|------------------------------------------------------------------------------------------------------------------------------------------------------------------------------------------------------------|
|                                        |                                                                                              | <ul style="list-style-type: none"> <li>Better patient satisfaction reported in the intervention group when compared to UC</li> </ul>                                                                                                                                                                                                                          |                                                                                                                                                                                                            |
| Ronda et al 2015 [54], USA, 75         | Data analyzed using SPSS v20, Chi-squared $X^2$ , unpaired $t$ tests and logistic regression | <ul style="list-style-type: none"> <li>Users were younger with a paid job, had better diabetes knowledge, used insulin and experienced more hypo/hyperglycemic episodes</li> <li>Ease of access to consultation information from home (75.5%, 312/413), and an opportunity to monitor disease and treatments (42.5%, 132/413) motivated self-care.</li> </ul> | Portal designs need to help patients to make appropriate lifestyle changes. The language used on portals needs to be simplified and less jargonistic. Medical terms require explanation and abbreviations. |
| Ronda et al 2014 [55], Netherlands, 50 | Chi-square $X^2$ and Mann-Whitney $U$ tests                                                  | <ul style="list-style-type: none"> <li>T2DM patients with complex symptoms, on 5 or more medications, perceived more diabetes-related distress but had better knowledge of their disease and more likely to request a log-in</li> <li>Age, gender, educational attainment and work status played an important role in requesting a log-in</li> </ul>          | Web-based portals have the possibility of reducing visits to outpatient clinics without compromising the quality of care.                                                                                  |
| Ronda et al 2013 [56], Netherlands, 75 | Chi-squared $X^2$ & Mann-Whitney $U$ tests. Data analyzed using SPSS v20                     | <ul style="list-style-type: none"> <li>Regular users (75.5%, 312/413) motivated to access results from home. Only 32% (132/413) used the opportunity to monitor disease and treatments, and 17.9% (74/413) accessed physician recommendations. Just 0.5% (2/413) were dissatisfied with current care.</li> </ul>                                              | Better strategies have to be found to inform patients about Web-based portals, how to request a login and advise on the long-term benefits a portal may offer.                                             |
| Fisher et al 2009 [57], UK, 75         | NVIVO v2 - Content Analysis                                                                  | <ul style="list-style-type: none"> <li>Record access improved shared management and decision making between doctor and patient</li> <li>Empowerment through self-care or management improved communication, enhanced</li> </ul>                                                                                                                               | Future studies need to focus on the measurement of these outcomes once electronic access becomes well-established.                                                                                         |

|                                             |                                                    |                                                                                                                                                                                                                                                                                                                                                                                                                                                                                                                                                                                                                                                         |                                                                                                                                                                                                              |
|---------------------------------------------|----------------------------------------------------|---------------------------------------------------------------------------------------------------------------------------------------------------------------------------------------------------------------------------------------------------------------------------------------------------------------------------------------------------------------------------------------------------------------------------------------------------------------------------------------------------------------------------------------------------------------------------------------------------------------------------------------------------------|--------------------------------------------------------------------------------------------------------------------------------------------------------------------------------------------------------------|
|                                             |                                                    | <p>patient-doctor relationships, and adherence to treatment</p> <ul style="list-style-type: none"> <li>• Attitudes to quality of care delivery focused on speed of access, continuity, and ownership of health records</li> </ul>                                                                                                                                                                                                                                                                                                                                                                                                                       |                                                                                                                                                                                                              |
| <p>Jilka et al 2015 [58], UK, MMAT: N/A</p> | <p>Interpretative Review</p>                       | <ul style="list-style-type: none"> <li>• There is currently insufficient evidence about the effect of patient accessible electronic health records (PAEHRs) on health outcomes related to; patients' safety, usefulness, satisfaction and self-efficacy across patients and HCPs.</li> <li>• Only 50% of studies (5/10) showed positive changes in online access to CMRs</li> <li>• Patients believe that access to CMRs increases perception of control but viewing results can create anxiety</li> <li>• Nurses more likely than physicians to gain time efficiencies with CMRs use</li> <li>• Physicians' main concern is online security</li> </ul> | <p>Current research is too targeted within certain clinical groups. Research should address understanding of how access CMRs can bridge the gap between patients and HCPs, using up to date technologies</p> |
| <p>Bomba et al 2004 [59], Australia, 75</p> | <p>Descriptive statistics and content analysis</p> | <ul style="list-style-type: none"> <li>• A unique USB (Universal Serial Bus) stick which allows patients and GPs controlled access to CMR, but does not reduce patient consultations times</li> <li>• The USB system promotes patient empowerment, reducing the possibility of GP as gatekeeper role of patient</li> </ul>                                                                                                                                                                                                                                                                                                                              | <p>USB system is seen as an acceptable innovation which could be rolled out to the wider community</p>                                                                                                       |
