# Supplementary material for: The Impact of Patient Online Access to Computerized Medical Records and Services on Type 2 Diabetes: Systematic Review
Source: PubMed Central journal article supplement (PMC6054706; doi:10.2196/jmir.7858), 2018-07-06
Supplement: jmir_v20i7e235_app5.pdf [file jmir_v20i7e235_app5.pdf]

|                           |   |   |  |  |  |  |   |   |   |   |   |   |   |   |  |  |  |   |   |   |  |      |
|---------------------------|---|---|--|--|--|--|---|---|---|---|---|---|---|---|--|--|--|---|---|---|--|------|
| Tang et al, 2013 [49]     | Y | Y |  |  |  |  | Y | Y | Y | Y |   |   |   |   |  |  |  |   |   |   |  | 100% |
| Tenforde et al, 2011 [43] | Y | Y |  |  |  |  |   |   |   |   | Y | Y | Y | Y |  |  |  |   |   |   |  | 100% |
| Wade-Vuturo, 2013 [46]    | Y | Y |  |  |  |  |   |   |   |   |   |   |   |   |  |  |  | Y | Y | C |  | 75%  |
| Wald et al, 2010 [40]     | Y | Y |  |  |  |  | Y | N | Y | Y |   |   |   |   |  |  |  |   |   |   |  | 75%  |
| Weppner et al, 2010 [41]  | Y | Y |  |  |  |  |   |   |   |   | Y | Y | Y | N |  |  |  |   |   |   |  | 75%  |

**MMAT Key: Y: Yes; N: No; C: Can't tell**
